# Supplementary material for: Rapid Start-Up of the Aerobic Granular Reactor under Low Temperature and the Nutriment Removal Performance of Granules with Different Particle Sizes
Source: MDPI journal article supplement (doi:10.3390/w13243590), 2021-12-14
Supplement: s1 [file s1]

Archive with 1 entries (1 files):
- water-1424288-supplementary.pdf
