# Supplementary figures and images for: Rapid Start-Up of the Aerobic Granular Reactor under Low Temperature and the Nutriment Removal Performance of Granules with Different Particle Sizes
Source: MDPI journal article supplement (doi:10.3390/w13243590), 2021-12-14

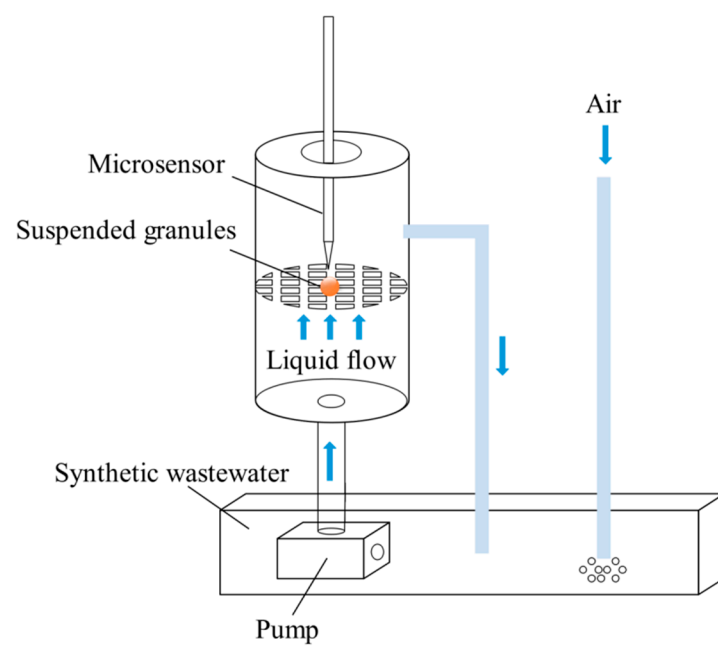

**Figure S1.** Configuration of the microsensor device.

Supplement: s1 [file s1]
